# Supplementary material
Source: Elsevier journal article supplement (https://www.sciencedirect.com/science/article/pii/S0211563820300031)
Supplement: mmc1 [file S0211563820300031:mmc1.docx]

**TABLA COMPLEMENTARIA. EVALUACIÓN DEL RIESGO DE SESGO BASADA EN LA HERRAMIENTA PROPUESTA POR EL MANUAL COCHRANE.**

| Herramienta manual  Cochrane | 1 | 2 | 3 | 4 | 5 | 6 | 7 | 8 | 9 | 10 | 11 | 12 |
| --- | --- | --- | --- | --- | --- | --- | --- | --- | --- | --- | --- | --- |
| Reid et al12 | Si | Si | Si | Si | No | Si | Si | No | NR | Si | No | Si |
| Maltais et al18 | Si | Si | Si | Si | No | Si | Si | No | NR | Si | No | Si |
| Rendstone et al13 | Si | Si | Si | Si | No | Si | Si | No | NR | Si | No | Si |
| Hill et al17 | Si | Si | Si | No | No | Si | Si | No | Si | Si | No | Si |
| Barks et al14 | Si | Si | Si | Si | No | Si | Si | No | No | Si | No | Si |
| Barks et al15 | Si | Si | Si | Si | No | Si | Si | No | No | Si | No | Si |
| Shin et al6 | Si | Si | Si | Si | No | Si | Si | No | NR | Si | No | Si |
| *1.- Definición clara de objetivos, 2.- Criterios de selección y población de estudio, 3.- Representación de la muestra, 4.- Todos los sujetos elegibles fueron incluidos, 5.- Tamaño de la muestra, 6.- Intervención descrita con claridad, 7.-Resultados fiables, descritos y válidos, 8.- Cegamiento de los evaluadores, 9.- Tasa de seguimiento, 10.- Análisis estadístico, 11.- Medidas de resultado múltiples, 12.- Resultados a nivel de grupo y a nivel individual.*  *Si: Bajo riesgo de sesgo, No: Alto riesgo de sesgo, Otro (riesgo poco claro): ND: No puede ser determinado, NA: No aplicable, NR: No reportado* | | | | | | | | | | | | |
